# Supplementary material
Source: PubMed Central journal article supplement (PMC4453799)
Supplement: supp_pp.15.00503_00503suppdata.pdf [file supp_pp.15.00503_00503suppdata.pdf]

## Supplemental Data

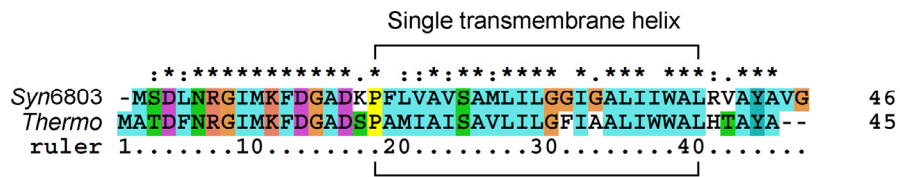

**Supplemental Figure S1.** Sequence comparison between an ORF product (*Synechocystis* sp. strain PCC 6803) and NdhQ (*Thermosynechococcus elongatus*). The sequences were aligned using ClustalX 1.83. Asterisks indicate identical amino acids; colons and dots indicate conserved amino acid substitutions. Membrane domain analysis was performed by the TMHMM software and single transmembrane helix was signed.

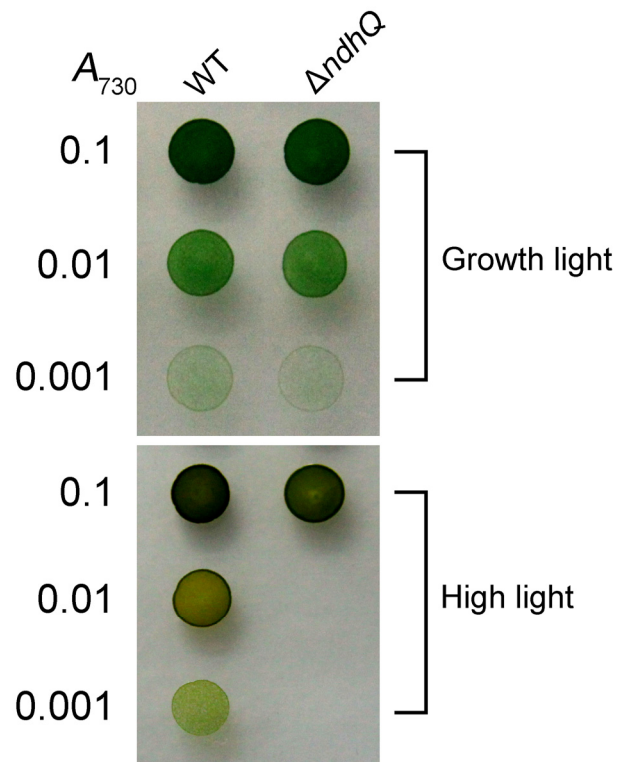

**Supplemental Figure S2.** Growth of WT and  $\Delta ndhQ$  cells on the agar plates under different light intensities. Three  $\mu\text{l}$  of cell suspensions with densities corresponding to  $A_{730}$  nm values of 0.1 (upper rows), 0.01 (middle rows), and 0.001 (lower rows) were spotted on agar plates and were incubated under 2%  $\text{CO}_2$  in air ( $v/v$ ) at normal light ( $40 \mu\text{mol photons m}^{-2}\text{s}^{-1}$ ) and high light ( $200 \mu\text{mol photons m}^{-2}\text{s}^{-1}$ ).

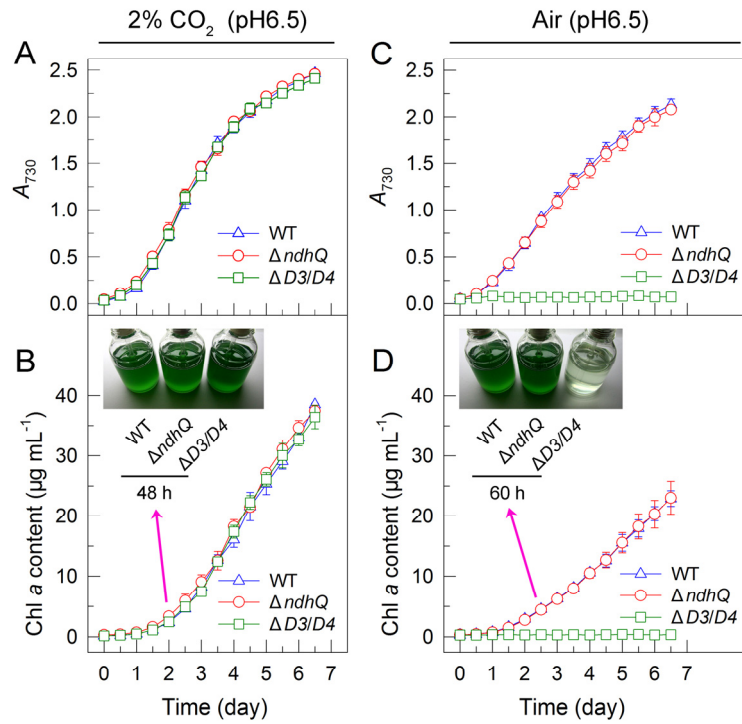

**Supplemental Figure S3.** Growth curve of WT,  $\Delta ndhQ$  and  $\Delta D3/D4$  cells. A and B, Cell density (A) and chlorophyll *a* content (B) were monitored under 2% CO<sub>2</sub> in air (*v/v*) and pH6.5. Values are means  $\pm$  SD ( $n = 5$ ). C and D, Cell density (C) and chlorophyll *a* content (D) were monitored under air level of CO<sub>2</sub> and pH6.5. Values are means  $\pm$  SD ( $n = 5$ ).

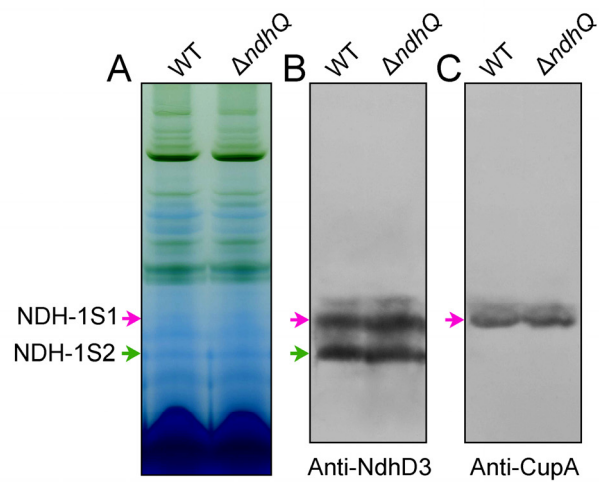

**Supplemental Figure S4.** Western analyses of NDH-1S complex from the air-grown WT and  $\Delta ndhQ$  cells. A, Thylakoid protein complexes isolated from the air-grown WT and  $\Delta ndhQ$  cells were separated by BN-PAGE. Thylakoid membrane extract corresponding to 7  $\mu\text{g}$  chlorophyll *a* was loaded onto each lane. The position of NDH-1S1 and NDH-1S2 complexes was indicated by pink and green arrows, respectively. B, Protein complexes were electroblotted to a polyvinylidene difluoride membrane, and the membrane was cross-reacted with anti-NdhD3 and CupA to probe the assembly of NDH-1S complex.

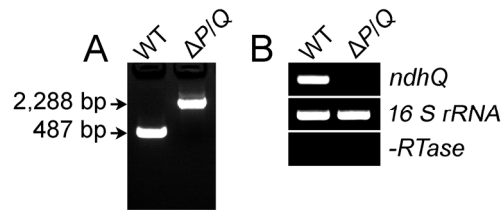

**Supplemental Figure S5.** Identification of the  $\Delta P/Q$  double mutant. A, PCR segregation analysis of the  $\Delta P/Q$  double mutant using the *ndhQ*-G and *ndhQ*-H primer sequences (Supplemental Table S1). B, Transcript levels of *ndhQ* in the WT and  $\Delta P/Q$  strains. The transcript level of *16 S rRNA* in each sample is shown as a control. The absence of contamination of DNA was confirmed by PCR without reverse transcriptase reaction.

**Supplemental Table S1.** Primers used in this study.

Primers used for identifying the sites of transposon insertion.

| Name           | Primer sequence (5'–3')   | Purpose                                    |
|----------------|---------------------------|--------------------------------------------|
| Transprimer-FP | ACCTACAACAAAGCTCTCATCAACC | Identifying the transposon insertion sites |
| Transprimer-RP | GCAATGTAACATCAGAGATTTTGAG |                                            |

Primers used to construct the pUC-*ΔndhQ* vector.

| Name           | Primer sequence (5'–3')    | Purpose                             |
|----------------|----------------------------|-------------------------------------|
| <i>ndhQ</i> -A | GCTGCAGCGGTGTTTAATTCGTCTAG | Amplification of upstream region    |
| <i>ndhQ</i> -B | CGGATCCGAACTTACCGCCATCATC  |                                     |
| <i>ndhQ</i> -C | CGGGATCCAAAATAAAAAAGGGG    | Amplification of spectinomycin gene |
| <i>ndhQ</i> -D | CGAGCTCAAATAAAAAAGGGGACC   |                                     |
| <i>ndhQ</i> -E | CGAGCTCAAACCGACTCTCCAAAAG  | Amplification of downstream region  |
| <i>ndhQ</i> -F | GGAATTCGCTTTCTCGCTAGCATG   |                                     |
| <i>ndhQ</i> -G | CATCAACACACTACCCGCCAG      | Segregation analysis                |
| <i>ndhQ</i> -H | GATTCCCTGCTTTGGGCCATG      |                                     |

Primers used to identify the segregation of *ndhQ* in *ΔndhP/Q* mutant.

| Name           | Primer sequence (5'–3') |
|----------------|-------------------------|
| <i>ndhQ</i> -G | CATCAACACACTACCCGCCAG   |
| <i>ndhQ</i> -H | GATTCCCTGCTTTGGGCCATG   |

Primers used to construct the pEYFP-NdhQ-YFP-His6 plasmid.

| Name                    | Primer sequence (5'–3')   | Purpose                                              |
|-------------------------|---------------------------|------------------------------------------------------|
| <i>ndhQ-yfp-his6</i> -A | GCGTCGACTATTTCTGAAACTAATG | Amplification of <i>ndhQ</i> and its upstream region |
| <i>ndhQ-yfp-his6</i> -B | GGGTACCAAGCCCACAGCGTAG    |                                                      |
| <i>ndhQ-yfp-his6</i> -C | GGAATTCGAACTTACCGCCATCATC | Amplification of downstream region                   |
| <i>ndhQ-yfp-his6</i> -D | GACTAGTGGCTACGGACACTCCCAC |                                                      |
| <i>ndhQ-yfp-his6</i> -E | GCGTCGACTATTTCTGAAACTAATG | Segregation analysis                                 |
| <i>ndhQ-yfp-his6</i> -F | GACTAGTGGCTACGGACACTCCCAC |                                                      |

Primers used for RT-PCR.

| Name                 | Primer sequence (5'–3')   | Purpose                     |
|----------------------|---------------------------|-----------------------------|
| <i>ndhQ</i> -FP      | GTCAGACCTGAACCGTGGCATCATG | <i>ndhQ</i> transcript      |
| <i>ndhQ</i> -RP      | GCTACCCGTAGGGCCAGATAATC   |                             |
| <i>16 S rRNA</i> -FP | CGACTGCTAATACCCAATGTGC    | <i>16 S rRNA</i> transcript |
| <i>16 S rRNA</i> -RP | GTCCCTCAGTGTGAGTTTCAGC    |                             |
